1           **Novel insights into the structure and transport mechanisms of TAPT1**

2       Md Sorwer Alam Parvez<sup>1</sup>, Mohammad Mahfujur Rahman<sup>1</sup>, Md Niaz Morshed<sup>1</sup>, Dolilur Rahman<sup>1</sup>, Saeed

3       Anwar<sup>2</sup>, Paul J. Coucke<sup>3</sup>, Mohammad Jakir Hosen<sup>1,\*</sup>

4       <sup>1</sup>Department of Genetic Engineering & Biotechnology, Shahjalal University of Science & Technology,

5       Sylhet 3114, Bangladesh

6       <sup>2</sup>Department of Medical Genetics, Faculty of Medicine and Dentistry, University of Alberta, 8440 112 St.

7       NW, Edmonton, AB T6G 2R7, Canada

8       <sup>3</sup>Center for Medical Genetics, Ghent University Hospital, 9000 Ghent, Belgium

9       \*Corresponding author: E-mail: [jakir-gen@sust.edu](mailto:jakir-gen@sust.edu)

10      **Running title:** Structure and transport mechanisms of TAPT1

11 **Abstract**

12 Transmembrane anterior-posterior transformation protein 1 (TAPT1), encoded by the *TAPT1* gene  
13 expressed in the basal ciliary body, plays a crucial role in cilia formation as well as axial skeletal patterning.  
14 Mutations in this gene have been reported to cause several ciliopathies and osteo-related diseases.  
15 Unfortunately, the cellular and molecular pathogenic mechanisms are still unclear also due to the lack of  
16 X-ray crystallographic structure and further characterization of TAPT1 protein. In this study, we attempted  
17 to characterize this protein by *in silico* techniques. A 3D structure of TAPT1 was generated by the *ab initio*  
18 method, which was further used for the analysis of the substrate-binding site, to determine pore size and  
19 for the prediction of the possible substrate(s). Validation by using different software packages revealed a  
20 reliable 3D model of TAPT1. Topology modeling revealed that TAPT1 has eight transmembrane helices  
21 with a total number of 27 helices in secondary structure. The amino acid residues H235, R323, K443, N446,  
22 S447, L450, K453, S454, Y457, K511, N513, D533, K535, D536, and T538 were found to form the pore  
23 surface as well as involved in the binding interaction with the substrate(s). This study predicted flavonoids  
24 as the possible substrate for TAPT1, which could further be confirmed by ingenuity pathway analysis.  
25 Moreover, our analysis indicated that TAPT1 might localize in the mitochondrial membrane in addition to  
26 the ciliary basal body. Our study gives novel insights for TAPT1 structure and its function.

27 **Keywords:** TAPT1, topology modeling, substrate-binding site, homology modeling, molecular docking

## 28 **1. Introduction**

29 The evolutionary conserved human trans-membrane anterior-posterior transformation protein 1 (TAPT1) is  
30 encoded by the TAPT1 gene, located at Ch4 p15.32. In eukaryotes, TAPT1 plays a role in axial skeletal  
31 patterning during early embryonic development [1, 2]. Mutations in TAPT1 causes a lethal congenital  
32 syndrome, by which clinical features overlap between skeletal dysplasia and ciliopathies [3]. The cellular  
33 and molecular mechanisms causing the syndrome are still unclear. Although expression of the TAPT1 is  
34 noticed at most body sites, localization is most common at the centrosome and basal ciliary body [4].  
35 Defective TAPT1 mislocalized in the cytoplasm disrupts the morphology of the Golgi apparatus and  
36 intracellular protein trafficking, giving rise to abnormal cilia formation [3, 5].

37 In mice, *Tapt1* is predicted to comprise of several transmembrane domains, and part of the gene is  
38 orthologous to alternatively spliced human transcript encoding the cytomegalovirus gH receptor. Besides,  
39 Howell et al. also speculated that *Tapt1* acts as a downstream effector of *Hoxc8* that may transduce  
40 extracellular information required for axial skeletal patterning during embryonic development [6]. In  
41 zebrafish models, knockdown of *tapt1b* revealed delayed ossification and abnormal craniofacial skeleton  
42 development, linked to abnormal cranial neural crest cell differentiation [3].

43 To date, several studies endeavored to characterize TAPT1. However, the absence of a high-resolution X-  
44 ray crystallographic structure, the unknown substrate(s), and undefined molecular signaling pathway  
45 challenged the characterization of the protein. A comprehensive in silico analysis, including 3D homology  
46 modeling and other computational approaches, could be an alternative approach to gain insights into the  
47 proteins' structure, potential binding sites, and the possible substrate(s). Such studies would help gain  
48 envisage the mechanisms of substrate interaction with the protein, as well as to disclose involved molecular  
49 signaling pathways [7-9]. The current study aimed to characterize TAPT1, both structurally and functionally,  
50 using computational approaches, which may give novel insights into the function of this protein and  
51 understand the underlying pathogenic mechanisms of the diseases associated with it.

52

## 53 **2. Materials and Methods**

### 54 **2.1 Prediction of secondary structure and topology model of TAPT1**

55 The primary sequence of human TAPT1 protein (accession no: AAH66899.1) was retrieved from the  
56 GenBank database of the National Center for Biotechnology Information (NCBI), which has a sequence  
57 length of 567 amino acids [10]. The protein secondary structure was analyzed using PSIPRED secondary  
58 structure prediction server, and the topology was predicted by the MEMSAT-SVM of the PSIPRED  
59 workbench online server [11-13]. PDBsum was also used to predict the secondary structure from the  
60 generated 3D model [14].

### 61 **2.2 Generation and validation of TAPT1 3D homology model**

62 The Basic Local Alignment Search Tool (BLAST) program of NCBI was used against the Protein Data Bank  
63 (PDB) to find the template for the homology modeling [15]. Unfortunately, no significant hit was found.  
64 Henceforth, the *ab initio* method was used to generate the 3D model of TAPT1. The Robetta server was  
65 used to model TAPT1 by the *ab initio* method [16]. Further, the generated 3D model was validated using  
66 RAMPAGE, PROCHECK, and ERRAT [17-19]. For the visualization of the model, a user-sponsored  
67 molecular visualization system, PyMOL was used [20].

### 68 **2.3 Determination of pore diameter and pore-lining residues**

69 We analyzed the transporter channel using the PoreWalker server, a fully automated method designed to  
70 detect and characterize transmembrane protein channels from their 3D structure [21]. Further, the  
71 PoreLogo server was used to visualize the sequence and conservation of pore-lining residues in  
72 transmembrane protein structures [22].

### 73 **2.4 Subcellular localization and transporter substrate specificity prediction**

74 The subcellular localization of this transporter was predicted by LocTree3 server which predicts the  
75 subcellular localization for all proteins in all domains of life where Water-soluble globular and  
76 transmembrane proteins are predicted in one of 18 classes in Eukaryota (e.g., chloroplast, chloroplast  
77 membrane, cytosol, ER, Golgi, ER membrane, Golgi membrane, extracellular, mitochondria, mitochondria  
78 membrane, nucleus, nucleus membrane, peroxisome, peroxisome membrane, plasma membrane, plastid,

79 vacuole, and vacuole membrane) [23]. Further, the TrSSP server was used to predict the types of  
80 substrates specific for this transporter. This server predicts the substrate specificity based on evolutionary  
81 information and the AA index [24].

## 82 **2.5 Protein-protein interaction analysis and prediction of the functions**

83 GeneMANIA was used for the protein-protein interaction analysis. These tools also predict the functions by  
84 analyzing a large number of functional association data, including protein and genetic interactions,  
85 pathways, co-expression, co-localization, and protein domain similarity [25].

## 86 **2.6 Molecular docking analysis for substrate prediction**

87 Molecular docking analysis was carried out by AutoDock vina against predicted specific types of metabolites  
88 or molecules reported in the Human Metabolome Database (HMDB) [26, 27]. In our previously mentioned  
89 method, TrSSP predicted that TAPT1 involved in the transportation of charged molecules or metabolites.  
90 For which, only charged molecules or metabolites of HMDB was used as target ligands for molecular  
91 docking analysis. During this docking analysis, the grid box size was set to 75, 100, and 75 respectively for  
92 X, Y, and Z-axis, where the center was set to 35.254, 3.105 and 22.549 respectively for X, Y, and Z. Further,  
93 the binding site was analyzed in the PyMOL, and additionally, CASTp was used to cross-check the binding  
94 sites [28].

## 95 **2.7 Ingenuity pathway analysis for possible pathway prediction**

96 The top predicted substrate was then used for the ingenuity pathway analysis against TAPT1 by Ingenuity  
97 Pathway Analysis (IPA) [29]. IPA is an advanced bioinformatics tool that can generate the shortest possible  
98 pathway for the interesting data sets through ingenuity knowledge-based or text mining analysis. The  
99 shortest possible pathways were generated using the path explorer features of IPA, where the predicted  
100 substrate was selected as initial molecules. A hypothetical pathway was illustrated with Biorender.com  
101 concluding all the findings in this study.

102

103

## 104 **3. Results**

### 105 **3.1 Generation and validation of human TAPT1 *ab initio* model**

106 Mining of Protein Data Bank (PDB) revealed no high-resolution X-ray crystallographic structure and the  
107 homolog of TAPT1 is available. Thus, Robetta online server was used to generate a 3D homology model  
108 of TAPT1. Robetta generated five primary models, which were further validated using several structure  
109 assessment methods, including PROCHECK, ERRAT, and Ramachandran plot. Among the five, the best  
110 model (Fig. 1) was then selected based on the highest score of various parameters obtained from  
111 assessment methods. While the Ramachandran plot (generated by RAMPAGE) showed 99.5% residues  
112 of the best model are in the favored regions, PROCHECK showed 93.3% residues of this model were in  
113 most favored regions. ERRAT (which analyzes statistics of non-bonded interactions between different atom  
114 types based on characteristic atomic interaction) also showed an overall quality factor of the best-selected  
115 model is 97.967% (Fig. 2). Thus, the constructed best-selected model was highly reliable for further docking  
116 study.

### 117 **3.2 Secondary structure and topology model of TAPT1**

118 MEMSAT-SVM mediated topology modeling predicted that TAPT1 comprised eight transmembrane  
119 helices, and both the N-terminal and C-terminal region located in the extracellular region (Fig. 3). The  
120 secondary structure of TAPT1 was predicted by the PDBsum, which revealed the presence of 27 helices,  
121 32 beta turns, and a disulfide bond (Fig. 4).

### 122 **3.3 Insights of the TAPT1 transport channel pore**

123 This study revealed that 105 amino acids were involved in the formation of transport pore of the TAPT1,  
124 where amino acid residues H235, R323, K443, N446, S447, L450, K453, S454, Y457, K511, N513, D533,  
125 K535, D536, and T538 were present in the pore surface (Fig 5). Moreover, the pore was found in a diamond  
126 shape.

127

### 128 **3.4 Interactome analysis**

129 Interactomics revealed that TAPT1 has interaction with 20 other genes with a total number of 268 links.  
130 This gene has physical interactions with MIEF1, MYO10, SQRDL, P4HB, NDUFA13, DERL1, TXNDC15,  
131 SUCO, CAV1, RIC3, UBC, and PCNT while co-expressed with DDX6, NDUFA13, NAPA, SUCO, UBC,  
132 LYRM5, PTAR1, MED17 and RBL2 (Fig 6). Moreover, this interactomics predicted that TAPT1 might involve  
133 in the regulation intrinsic apoptotic signaling pathway, cellular response to oxygen level, intracellular  
134 transportation of virus and viral life cycle, and multi-organism transportation.

### 135 **3.5 Subcellular localization and substrate affinity of TAPT1**

136 Prediction of subcellular localization via LocTree3 revealed that TAPT1 possibly localized in the  
137 mitochondrial membrane, and the expected accuracy was 84%. Besides, substrate specificity analysis  
138 stated that TAPT1 would involve in the transportation of charged (both positive and negative) metabolites.

### 139 **3.6 Prediction of TAPT1 substrate by molecular docking and virtual screening**

140 We screened all the charged metabolites reported in the Human Metabolome DataBase (HMDB) as target  
141 ligands of the TAPT1 model. Molecular docking analysis revealed that flavonoid glycosides  
142 (HMDB0124740) have the highest affinity with the lowest binding energy (Table 1). Surprisingly, all the top  
143 10 compounds with the lowest binding energy were found in this subclass. Moreover, the binding site  
144 analysis revealed that amino acid A220, W223, T224, I239, R323, K443, S447, L450, N513, and P516 were  
145 involved in the interaction with the substrate (Fig 7). The same binding site was also predicted by the CASTp  
146 (Supplementary Fig 1).

### 147 **3.7 Involvement of TAPT1 in different signaling pathways**

148 Ingenuity pathway analysis was performed to understand the relationship between flavonoid and TAPT1,  
149 which revealed that flavonoid induced the expression of several genes, including ERK1/2, AHR, HMOX1,  
150 CYP1A1/2, and estrogen receptor, which in turn induced CCND1 and CAV1. CCND1 increases the  
151 expression of TAPT1, where CAV1 binds to TAPT1 to activate it (Fig 8).

## 152 4. Discussion

153 TAPT1 associated with several diseases, including Osteochondrodysplasia, Complex Lethal, Symoens-  
154 Barnes-Gistelincq Type, and Microcephaly caused by a mutation in this protein [3]. Nevertheless, it is still  
155 unclear how the mutation in TAPT1 leads to these diseases. It is essential to characterize TAPT1, unravel  
156 its substrate(s), and discovering the involved signaling pathways. However, due to the structural  
157 complexities, the experimental studies of the membrane proteins are challenging. Computational methods  
158 offer an alternative way of studying these proteins. Several studies have so far indicated the efficiency of  
159 computational methods in predicting the accurate structures of membrane proteins [30].

160 Moreover, it is very time consuming and costly to determine the substrates experimentally due to the  
161 complexity of the metabolic pathways. Therefore, computational approaches may help predict the potential  
162 substrates, which will lead to a valid experimental hypothesis [31]. In this present study, a 3D model was  
163 generated for TAPT1, and computational methods were employed to study the protein structurally and  
164 functionally. Molecular docking approaches were used to predict the substrates, and a knowledge-based  
165 ingenuity pathway was analyzed.

166 As no crystallographic structure was available for TAPT1, 3D models were generated, and the best one  
167 was selected according to the assessment score of validation tools. The results of the validation tools  
168 demonstrated that the selected model was reliable. Topology and secondary structure analysis from the  
169 primary sequence revealed that the protein had eight transmembrane helices. These helices were also  
170 predicted from the 3D structure of the protein. Moreover, it revealed that TAPT1 was localized in the  
171 mitochondrial membrane in addition to the basal ciliary body, which was also supported by protein-protein  
172 interaction analysis (PPI). The protein was found to interact with proteins localized in both the mitochondria  
173 and plasma membrane along with extracellular regions. Also, this interactomics revealed the involvement  
174 of TAPT1 with some other functions, e.g., intracellular trafficking and viral transport, which were already  
175 reported in several studies. A study conducted in a mouse model stated that TAPT1 provided the entry site  
176 or gH receptor for human cytomegalovirus [3, 6].



177 Molecular docking analysis revealed that flavonoids glycosides, as well as flavonoids, would be the potential  
178 substrates of TAPT1. The binding site analysis revealed that the amino acid residues involved in the  
179 interaction with flavonoids were the same as the pore-lining residues. The amino acid residues H235, R323,  
180 K443, N446, S447, L450, K453, S454, Y457, K511, N513, D533, K535, D536, and T538 were found to  
181 form the for the surface as well as the binding pocket. Moreover, castP server also predicted the same  
182 binding pocket in the TAPT1, which provided strong evidence for this hypothesis. Flavonoids are naturally  
183 occurring phenolic compounds that are integral components of the human diet. Several studies revealed  
184 that they are involved in the enhancement of bone formation and influence the osteogenic differentiation  
185 and mineralization. These compounds also play an essential role in neural crest cell differentiation,  
186 proliferation, and survival [32-34]. All of which were disrupted by the mutation in TAPT1 revealed by several  
187 studies.

188 Additionally, mutations in TAPT1 leads to several other diseases related to bone development and  
189 disruption in the cilia formation [3]. As flavonoids have a role in bone development and osteogenic  
190 differentiation, it was hypothesized that mutations in TAPT1 might disrupt the transfer of flavonoids which  
191 caused the osteo-related diseases. Moreover, the ingenuity pathway analysis also provided evidence for  
192 the relationship between TAPT1 and flavonoids. IPA revealed that flavonoids could be connected with  
193 TAPT1 through several pathways.

## 194 **5. Conclusion**

195 Trans-membrane anterior,-posterior transformation protein 1 (TAPT1) is associated with several  
196 ciliopathies and osteogenic diseases. This study provides insights into the structural and functional aspects  
197 of the protein. It indicates that flavonoids could be the possible substrate(s) of TAPT1. However, extensive  
198 wet-lab experiments are required to validate the outcomes of this study.

199 **Conflict of interest**

200 The authors declare that they have no competing interests.

201 **Ethical approval**

202 Not required.

203 **Acknowledgments**

204 We wholeheartedly acknowledge the cooperation of Sirazum Nadia Hoque (Dept. Computer Science &  
205 Engineering, International Islamic University, Chittagong) for helping us during the project designing.

206 **Funding**

207 No specific grant was received for this study. SA is supported by the (1) Alberta Innovates Graduate Student  
208 Scholarship (AIGSS), and the (2) Maternal and Child Health (MatCH) Scholarship programs. MJH receives  
209 grant support from the (1) Research Center, Shahjalal University of Science and Technology, (2)  
210 Bangladesh Bureau of Educational Information and Statistics, and the (3) Ministry of Education,  
211 Government of Bangladesh.

212 **Data availability**

213 All data supporting the findings of this study are available within the article and its supplementary materials

214 **Author contributions**

215 MH conceived the study. MP and SA designed the study. MP, MR, MM, DR conducted the experiments.  
216 MP, SA, MR, MM, DR, and PC analyzed and interpreted the data. MP wrote the original draft of the  
217 manuscript. MP, SA, PC, and MH reviewed and edited the final manuscript. All authors approved the final  
218 manuscript.

219 **References**

- 220 1. Holland, P. W., Booth, H. A. F., & Bruford, E. A. (2007). Classification and nomenclature of all human  
221 homeobox genes. *BMC biology*, 5(1), 47.
- 222 2. Kruger, C., & Kappen, C. (2010). Expression of cartilage developmental genes in Hoxc8-and Hoxd4-  
223 transgenic mice. *PLoS One*, 5(2), e8978.
- 224 3. Symoens, S., Barnes, A. M., Gistelinc, C., Malfait, F., Guillemy, B., Steyaert, W., ... & Witten, E. P.  
225 (2015). Genetic defects in TAPT1 disrupt ciliogenesis and cause a complex lethal  
226 osteochondrodysplasia. *The American Journal of Human Genetics*, 97(4), 521-534.
- 227 4. Uhlén, M., Fagerberg, L., Hallström, B. M., Lindskog, C., Oksvold, P., Mardinoglu, A., ... & Olsson, I.  
228 (2015). Tissue-based map of the human proteome. *Science*, 347(6220), 1260419.
- 229 5. Baldwin, B. R., Kleinberg, M., & Keay, S. (1996). Molecular cloning and expression of receptor peptides  
230 that block human cytomegalovirus/cell fusion. *Biochemical and biophysical research  
231 communications*, 219(2), 668-673.
- 232 6. Howell, G. R., Shindo, M., Murray, S., Gridley, T., Wilson, L. A., & Schimenti, J. C. (2007). Mutation of  
233 a ubiquitously expressed mouse transmembrane protein (Tapt1) causes specific skeletal homeotic  
234 transformations. *Genetics*, 175(2), 699-707.
- 235 7. Pettersen, E. F., Goddard, T. D., Huang, C. C., Couch, G. S., Greenblatt, D. M., Meng, E. C., &  
236 Ferrin, T. E. (2004). UCSF Chimera—a visualization system for exploratory research and analysis.  
237 *Journal of computational chemistry*, 25(13), 1605-1612.
- 238 8. Adzhubei, I. A., Schmidt, S., Peshkin, L., Ramensky, V. E., Gerasimova, A., Bork, P., ... & Sunyaev,  
239 S. R. (2010). A method and server for predicting damaging missense mutations. *Nature methods*,  
240 7(4), 248-249.
- 241 9. Mehmood, M. A., Sehar, U., & Ahmad, N. (2014). Use of bioinformatics tools in different spheres of  
242 life sciences. *Journal of Data Mining in Genomics & Proteomics*, 5(2), 1.
- 243 10. Benson, D. A., Karsch-Mizrachi, I., Lipman, D. J., Ostell, J., & Sayers, E. W. (2011). GenBank.  
244 *Nucleic acids research*, 39(Database issue), D32.
- 245 11. Jones DT. (1999) Protein secondary structure prediction based on position-specific scoring matrices.  
246 *J. Mol. Biol.* 292: 195-202.

- 247 12. Nugent, T. & Jones, D.T. (2009) Transmembrane protein topology prediction using support vector  
248 machines. *BMC Bioinformatics*. 10, 159. Epub
- 249 13. Buchan DWA, Jones DT (2019). The PSIPRED Protein Analysis Workbench: 20 years on. *Nucleic*  
250 *Acids Research*.
- 251 14. Laskowski, R. A., Hutchinson, E. G., Michie, A. D., Wallace, A. C., Jones, M. L., & Thornton, J. M.  
252 (1997). PDBsum: a Web-based database of summaries and analyses of all PDB structures. *Trends in*  
253 *biochemical sciences*, 22(12), 488-490.
- 254 15. H.M. Berman, J. Westbrook, Z. Feng, G. Gilliland, T.N. Bhat, H. Weissig, I.N. Shindyalov, P.E.  
255 Bourne.(2000) The Protein Data Bank *Nucleic Acids Research*, 28: 235-242.
- 256 16. Kim, D. E., Chivian, D., & Baker, D. (2004). Protein structure prediction and analysis using the  
257 Robetta server. *Nucleic acids research*, 32(suppl\_2), W526-W531.
- 258 17. Laskowski R A, MacArthur M W, Moss D S, Thornton J M (1993). PROCHECK - a program to check  
259 the stereochemical quality of protein structures. *J. App. Cryst.*, **26**, 283-291.
- 260 18. SC. Lovell, I.W. Davis, W.B. Arendall III, PIW de Bakker, J.M. Word, M.G. Prisant, J.S. Richardson and  
261 D.C. Richardson (2002) Structure validation by Calpha geometry: phi,psi and Cbeta deviation. *Proteins:*  
262 *Structure, Function & Genetics*. **50**: 437-450.
- 263 19. Colovos, C., & Yeates, T. O. (1993). Verification of protein structures: patterns of nonbonded atomic  
264 interactions. *Protein science*, 2(9), 1511-1519.
- 265 20. DeLano, W. L. (2002). Pymol: An open-source molecular graphics tool. *CCP4 Newsletter on protein*  
266 *crystallography*, 40(1), 82-92.
- 267 21. Pellegrini-Calace, M., Maiwald, T., & Thornton, J. M. (2009). PoreWalker: a novel tool for the  
268 identification and characterization of channels in transmembrane proteins from their three-dimensional  
269 structure. *PLoS computational biology*, 5(7), e1000440.
- 270 22. Oliva, R., Thornton, J. M., & Pellegrini-Calace, M. (2009). PoreLogo: a new tool to analyse, visualize  
271 and compare channels in transmembrane proteins. *Bioinformatics*, 25(23), 3183-3184.
- 272 23. Goldberg, T., Hecht, M., Hamp, T., Karl, T., Yachdav, G., Ahmed, N., ... & Bernhofer, M. (2014).  
273 LocTree3 prediction of localization. *Nucleic acids research*, 42(W1), W350-W355.

- 274 24. Mishra, N. K., Chang, J., & Zhao, P. X. (2014). Prediction of membrane transport proteins and their  
275 substrate specificities using primary sequence information. *PLoS One*, 9(6), e100278.
- 276 25. Warde-Farley, D., Donaldson, S. L., Comes, O., Zuberi, K., Badrawi, R., Chao, P., ... & Maitland, A.  
277 (2010). The GeneMANIA prediction server: biological network integration for gene prioritization and  
278 predicting gene function. *Nucleic acids research*, 38(suppl\_2), W214-W220.
- 279 26. Trott, O., & Olson, A. J. (2010). AutoDock Vina: improving the speed and accuracy of docking with a  
280 new scoring function, efficient optimization, and multithreading. *Journal of computational chemistry*,  
281 31(2), 455-461.
- 282 27. Wishart, D. S., Jewison, T., Guo, A. C., Wilson, M., Knox, C., Liu, Y., ... & Bouatra, S. (2012). HMDB  
283 3.0—the human metabolome database in 2013. *Nucleic acids research*, 41(D1), D801-D807.
- 284 28. Tian, W., Chen, C., Lei, X., Zhao, J., & Liang, J. (2018). CASTp 3.0: computed atlas of surface  
285 topography of proteins. *Nucleic acids research*, 46(W1), W363-W367.
- 286 29. Krämer, A., Green, J., Pollard Jr, J., & Tugendreich, S. (2013). Causal analysis approaches in ingenuity  
287 pathway analysis. *Bioinformatics*, 30(4), 523-530.
- 288 30. Lehnert, U., Xia, Y., Royce, T. E., Goh, C. S., Liu, Y., Senes, A., ... & Gerstein, M. (2004).  
289 Computational analysis of membrane proteins: genomic occurrence, structure prediction and helix  
290 interactions. *Quarterly reviews of biophysics*, 37(2), 121-146.
- 291 31. Niu, B., Huang, G., Zheng, L., Wang, X., Chen, F., Zhang, Y., & Huang, T. (2013). Prediction of  
292 substrate-enzyme-product interaction based on molecular descriptors and physicochemical  
293 properties. *BioMed research international*, 2013.
- 294 32. Weaver, C. M., Alekel, D. L., Ward, W. E., & Ronis, M. J. (2012). Flavonoid intake and bone health.  
295 *Journal of nutrition in gerontology and geriatrics*, 31(3), 239-253.
- 296 33. Nones, J., Costa, A. P., Leal, R. B., Gomes, F. C. A., & Trentin, A. G. (2012). The flavonoids hesperidin  
297 and rutin promote neural crest cell survival. *Cell and tissue research*, 350(2), 305-315.
- 298 **34.** Shi, W., Gao, Y., Wang, Y., Zhou, J., Wei, Z., Ma, X., ... & Chen, K. (2017). The flavonol glycoside  
299 icariin promotes bone formation in growing rats by activating the cAMP signaling pathway in primary  
300 cilia of osteoblasts. *Journal of Biological Chemistry*, 292(51), 20883-20896.

302 Table 1: Top 10 compounds based on the highest binding energy against TAPT1

| SI | HMDB No      | Name                                                                                                                                                                                                                                                                            | Class                  | Subclass                                  | Binding Affinity (kcal/mol) |
|----|--------------|---------------------------------------------------------------------------------------------------------------------------------------------------------------------------------------------------------------------------------------------------------------------------------|------------------------|-------------------------------------------|-----------------------------|
| 1  | HMDB01 24740 | 11-[(6-carboxy-3,4,5-trihydroxyoxan-2-yl)oxy]-3-methyl-6-[(3,4,5-trihydroxy-6-[(3,4,5-trihydroxy-6-methyloxan-2-yl)oxy]methyl)oxan-2-yl)oxy]-7-(3,4,5-trihydroxyphenyl)-2λ <sup>4</sup> ,8-dioxatricyclo[7.3.1.0 <sup>5,13</sup> ]trideca-1,3,5(13),6,9,11-hexaen-2-ylum        | Flavonoids             | Flavonoid glycosides                      | -11.7                       |
| 2  | HMDB00 41762 | Peonidin 3-(2-(6-(E)-caffeoyl-beta-D-glucosyl)-beta-D-glucoside) 5-beta-D-glucoside                                                                                                                                                                                             | Flavonoids             | Flavonoid glycosides                      | -11.4                       |
| 3  | HMDB00 41161 | Cyanidin 3-O-[b-D-Xylopyranosyl-(1->2)-[4-hydroxycinnamoyl-(->6)-b-D-glucopyranosyl-(1->6)]-b-D-galactopyranoside]                                                                                                                                                              | Flavonoids             | Flavonoid glycosides                      | -11.4                       |
| 4  | HMDB00 41162 | Cyanidin 3-O-[b-D-Xylopyranosyl-(1->2)-[(4-hydroxy-3-methoxycinnamoyl)-(->6)-b-D-glucopyranosyl-(1->6)]-b-D-galactopyranoside]                                                                                                                                                  | Flavonoids             | Flavonoid glycosides                      | -11.3                       |
| 5  | HMDB01 24738 | 7-{3-[(6-carboxy-3,4,5-trihydroxyoxan-2-yl)oxy]-4,5-dihydroxyphenyl}-11-hydroxy-3-methyl-6-[(3,4,5-trihydroxy-6-[(3,4,5-trihydroxy-6-methyloxan-2-yl)oxy]methyl)oxan-2-yl)oxy]-2λ <sup>4</sup> ,8-dioxatricyclo[7.3.1.0 <sup>5,13</sup> ]trideca-1,3,5(13),6,9,11-hexaen-2-ylum | Flavonoids             | Flavonoid glycosides                      | -11.3                       |
| 6  | HMDB00 33021 | Pelargonidin 3-O-[4-Hydroxy-3-methoxy-E-cinnamoyl-(->4)-a-L-rhamnopyranosyl-(1->6)-b-D-glucopyranoside] 5-O-b-D-glucopyranoside                                                                                                                                                 | Organooxygen compounds | Carbohydrates and carbohydrate conjugates | -11.2                       |
| 7  | HMDB01 34843 | 7-{4-[(6-carboxy-3,4,5-trihydroxyoxan-2-yl)oxy]-3,5-dimethoxyphenyl}-6,11-dihydroxy-3-(4-hydroxyphenyl)-2λ <sup>4</sup> ,8-dioxatricyclo[7.3.1.0 <sup>5,13</sup> ]trideca-1(13),2,4,6,9,11-hexaen-2-ylum                                                                        | Flavonoids             | Flavonoid glycosides                      | -11.2                       |
| 8  | HMDB01 34858 | 7-{4-[(6-carboxy-3,4,5-trihydroxyoxan-2-yl)oxy]-3,5-dimethoxyphenyl}-3-(3,4-dihydroxyphenyl)-6,11-dihydroxy-2λ <sup>4</sup> ,8-dioxatricyclo[7.3.1.0 <sup>5,13</sup> ]trideca-1(13),2,4,6,9,11-hexaen-2-ylum                                                                    | Flavonoids             | Flavonoid glycosides                      | -11.1                       |
| 9  | HMDB00 35455 | YGM 4B                                                                                                                                                                                                                                                                          | Flavonoids             | Flavonoid glycosides                      | -11                         |
| 10 | HMDB00 38095 | Petanin                                                                                                                                                                                                                                                                         | Flavonoids             | Flavonoid glycosides                      | -11                         |

303

## Figures

304 **Fig 1:** 3D model of TAPT1. (a) The ribbon model where red color represents the helices and green  
305 represents the loop. (b) Surface model of TAPT1

306 **Fig 2:** 3D model validation assessment results where Ramachandran plot was shown in (a), and error  
307 value was shown in (b)

308 **Fig 3:** Topology of the TAPT1 protein

309 **Fig 4:** Secondary structure prediction from the 3D model where H represents the helices,  $\beta$  represents  
310 beta-turn,  $\gamma$  represents the gamma turn, and the yellow line represents the disulfide bond.

311 **Fig 5:** Protein-protein interactions of TAPT1. Here, pink lines represent physical interactions. Violet lines  
312 represent the co-expression, and gold lines represent the predicted interactions.

313 **Fig 6:** Pore of the TAPT1 where (a) shows the pore surface with involved residues (b) pore diameter  
314 profile in 3 Armstrong (c) pore line from the surface side and (d) pore line from top to bottom

315 **Fig 7:** Docked figures of TAPT1 with its substrates. Here, different colors were used to represent the  
316 different pore-lining residues where blue color was used for Lys and His residues and red for Asp and Glu  
317 residues. Additionally, green used for Gly, Cys, Ser, Thr, and Tyr residues and gray for the remaining  
318 residues.

319 **Fig 8:** Hypothetical pathway of TAPT1. Here, arrow line represents the increasing of the expression while  
320 dot-headed line represents binding. Additionally, yellow color stated for membrane proteins, pink for  
321 receptor, cyan for proteins in cytosol and purple for nucleoplasm.

322

### **Supplementary files**

323    Supplementary Fig 1: The binding pocket of TAPT1 predicted by CASTp server



324

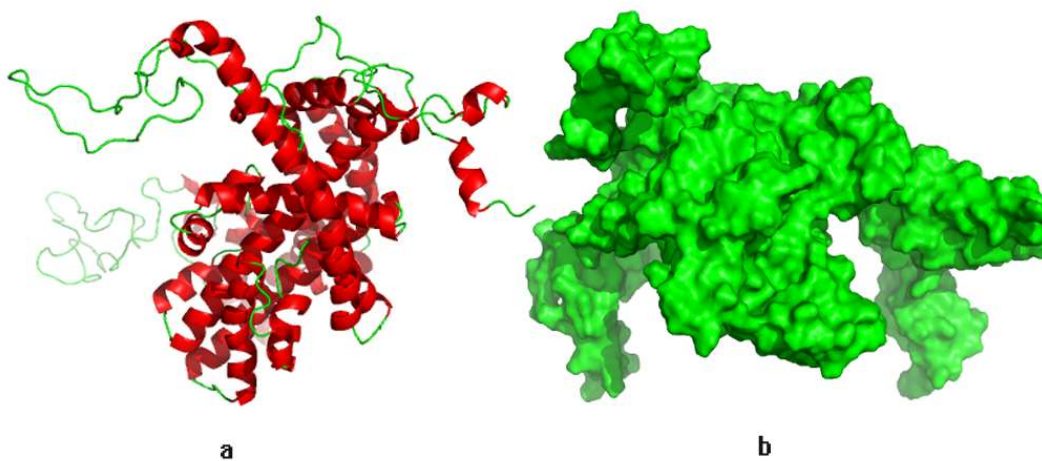

PROCHECK

### Ramachandran Plot

1078003

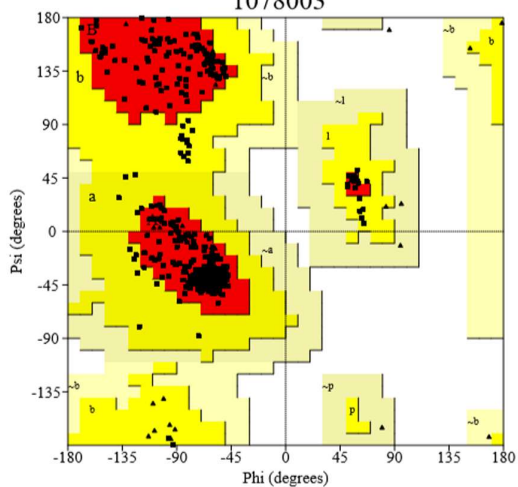

Overall quality factor\*: 97.967

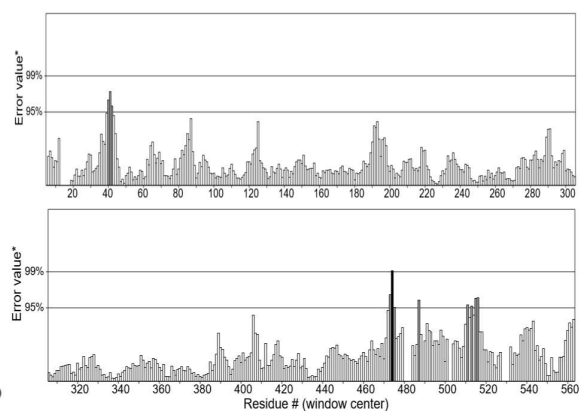

**a**

**b**

325

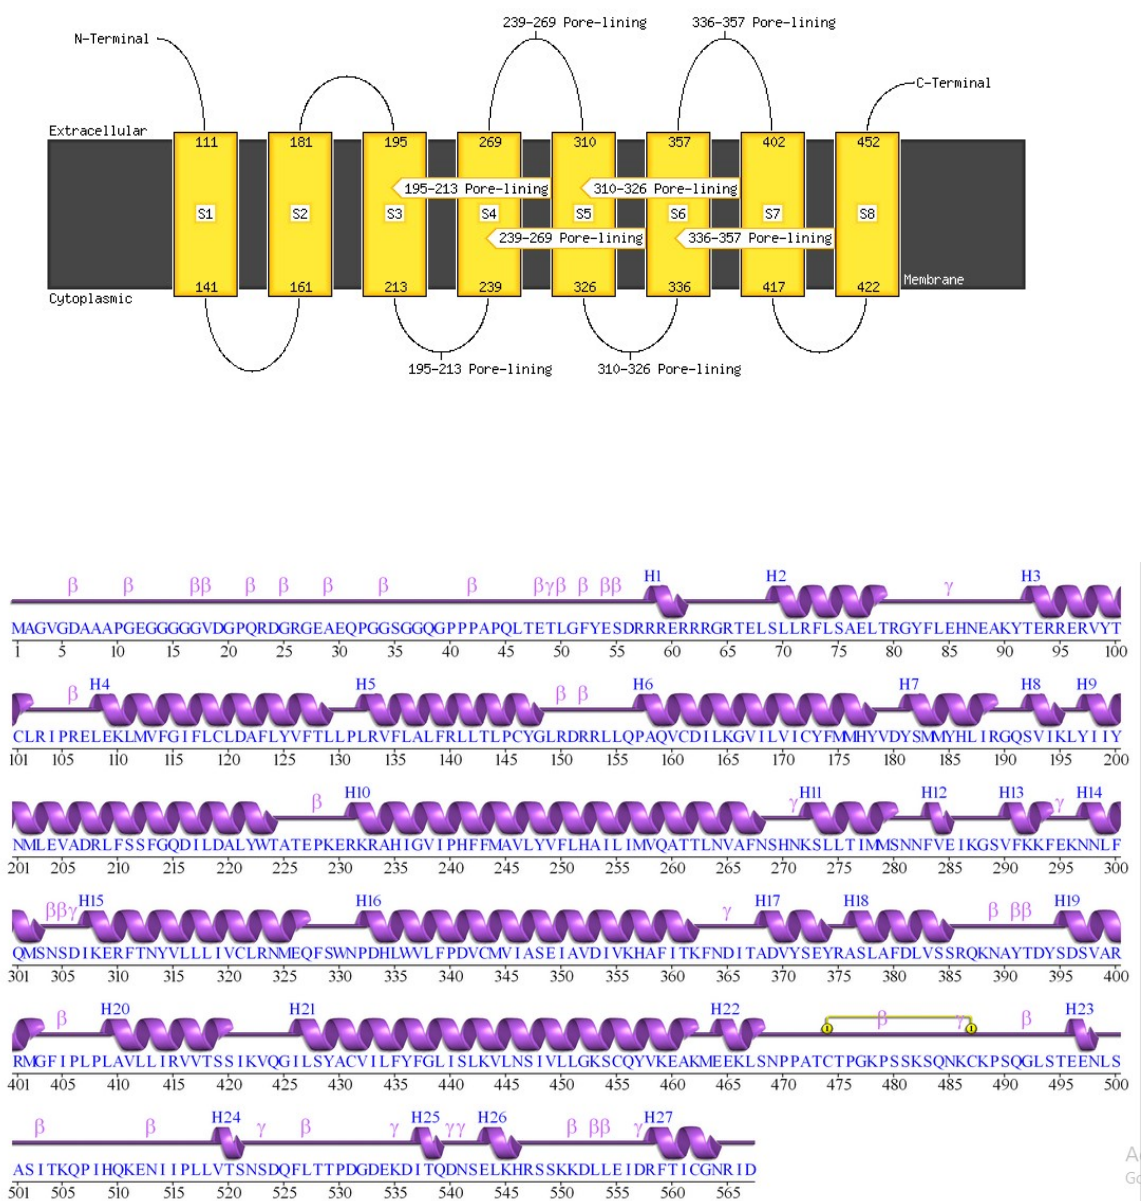

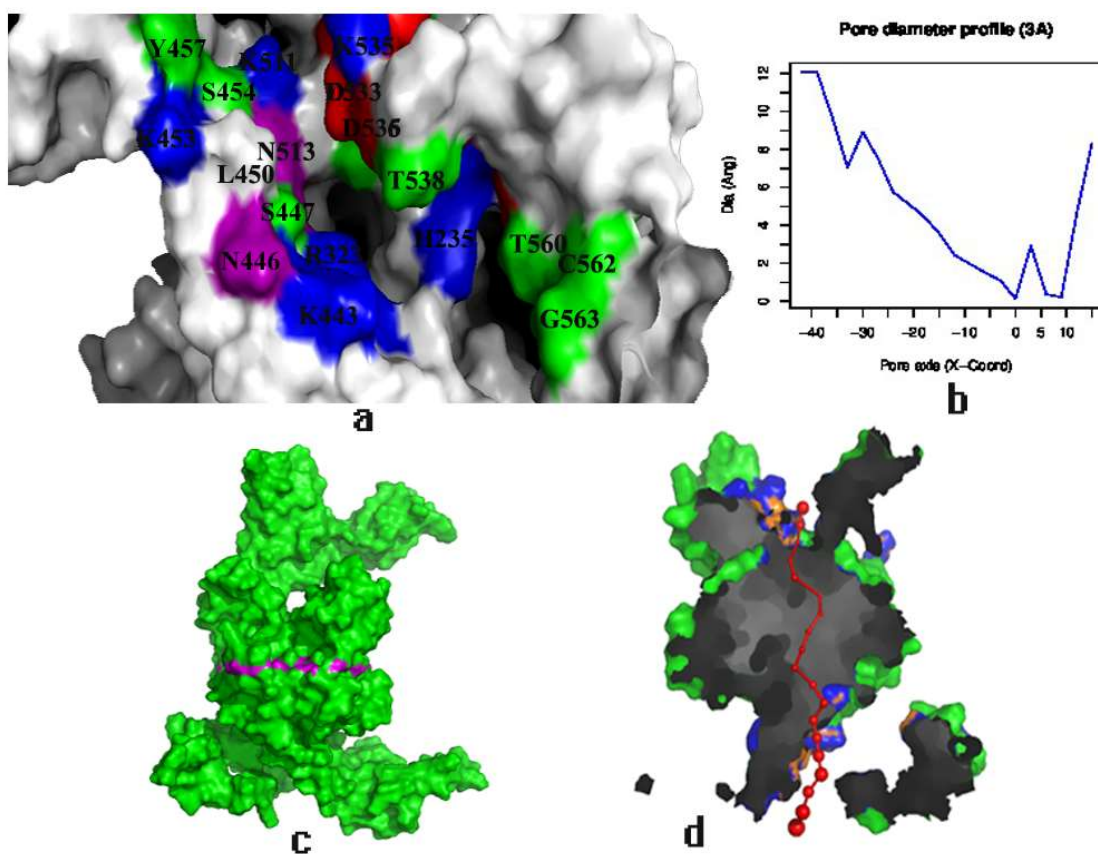

326

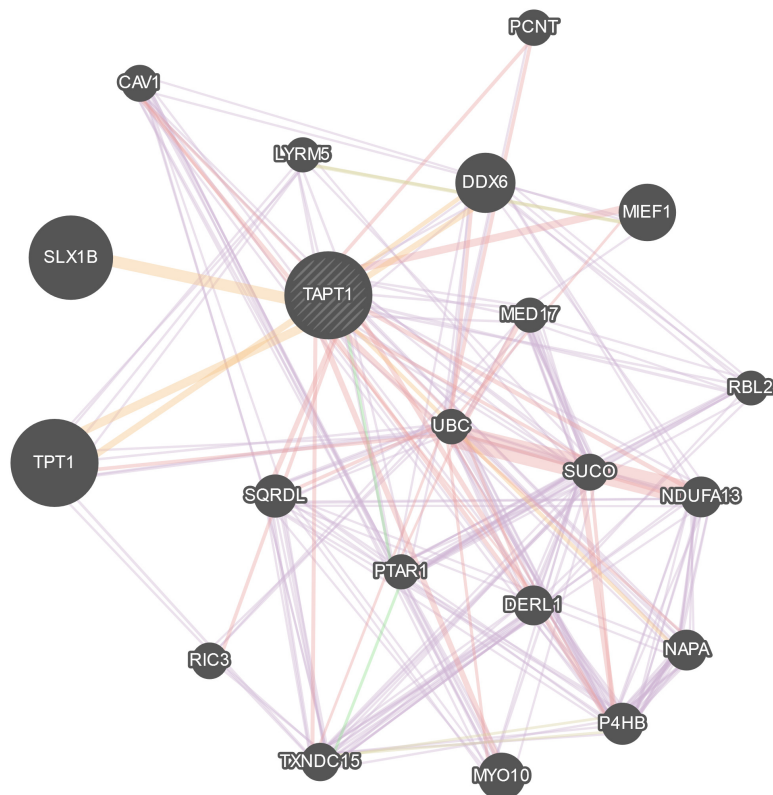

327

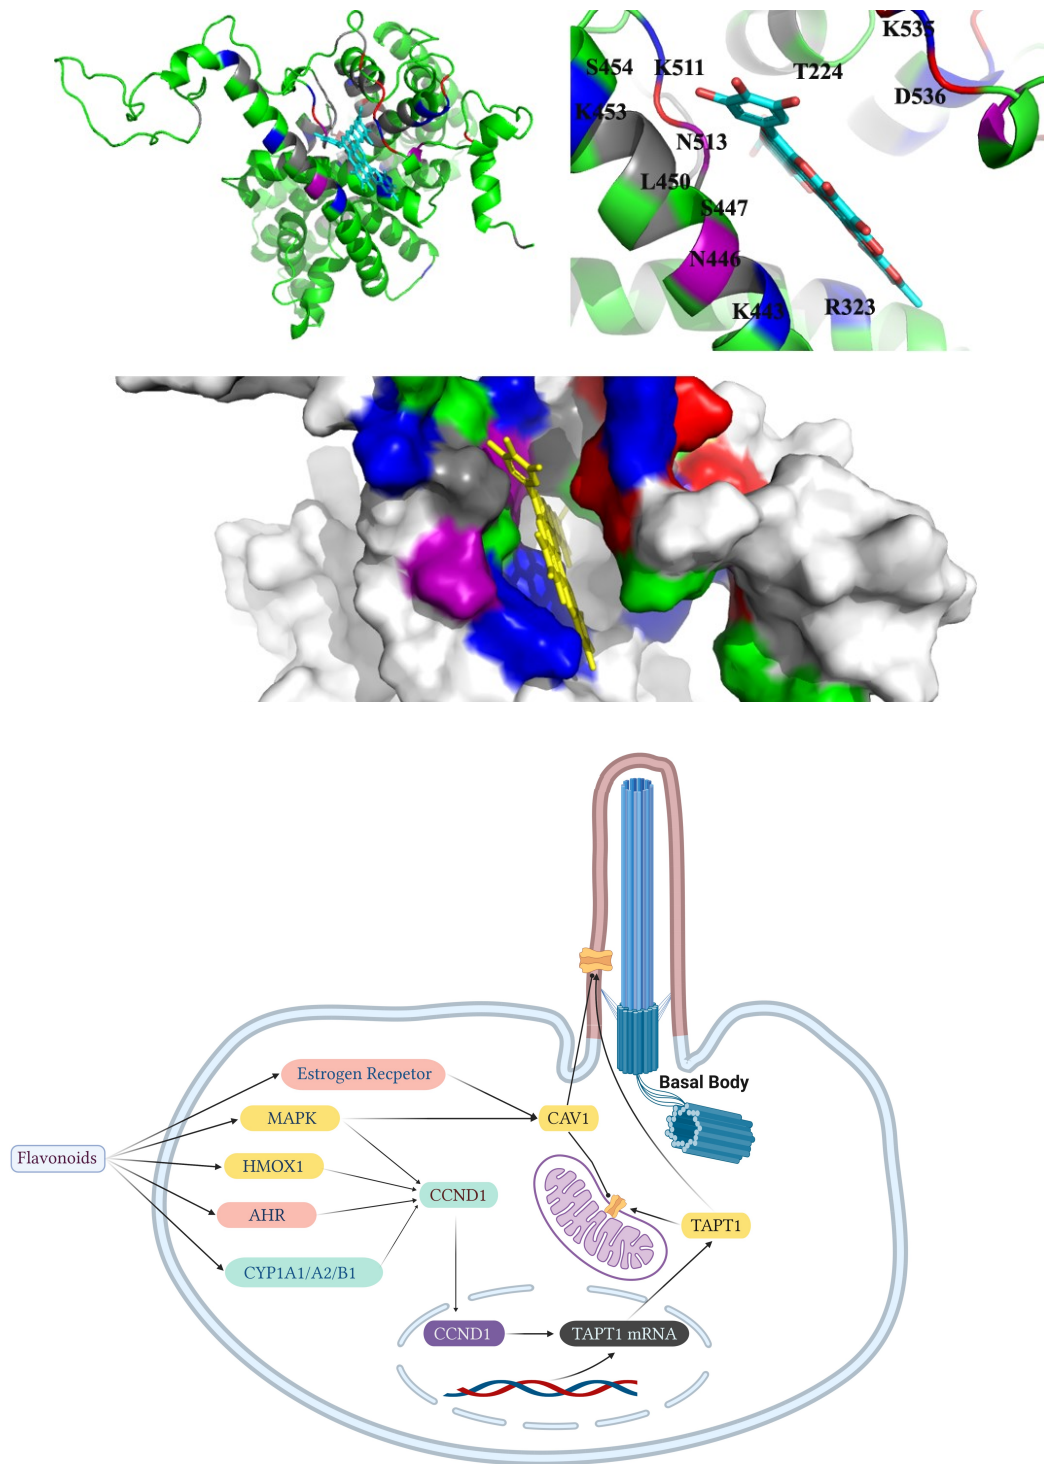

Source: https://www.biorxiv.org/content/10.1101/2020.05.18.099887v2.full.pdf
